# Supplementary material for: Easy conversion of protein-rich enoki mushroom biomass to a nitrogen-doped carbon nanomaterial as a promising metal-free catalyst for oxygen reduction reaction
Source: Royal Society of Chemistry journal article supplement (doi:10.1039/c5nr03828f), 2015-01-01
Supplement: c5nr03828f1.pdf [file c5nr03828f1.pdf]

## Supporting Information

### Easy conversion of protein-rich enoki mushroom biomass to nitrogen-doped carbon nanomaterial as a promising metal-free catalyst for oxygen reduction reaction

Chaozhong Guo<sup>a, b, \*</sup>, Wenli Liao<sup>c</sup>, Zhongbin Li<sup>c</sup>, Lingtao Sun<sup>a</sup>, Changguo Chen<sup>b, \*</sup>

<sup>a</sup>Research Institute for New Materials Technology, Chongqing University of Arts and Sciences,  
Yongchuan, Chongqing 402160, China

<sup>b</sup>School of Chemistry and Chemical Engineering, Chongqing University, Chongqing 400044, China

<sup>c</sup>School of Materials and Chemical Engineering, Chongqing University of Arts and Sciences,  
Yongchuan, Chongqing 402160, China

Corresponding Author: E-mail: guochaozhong1987@163.com; cgchen@cqu.edu.cn

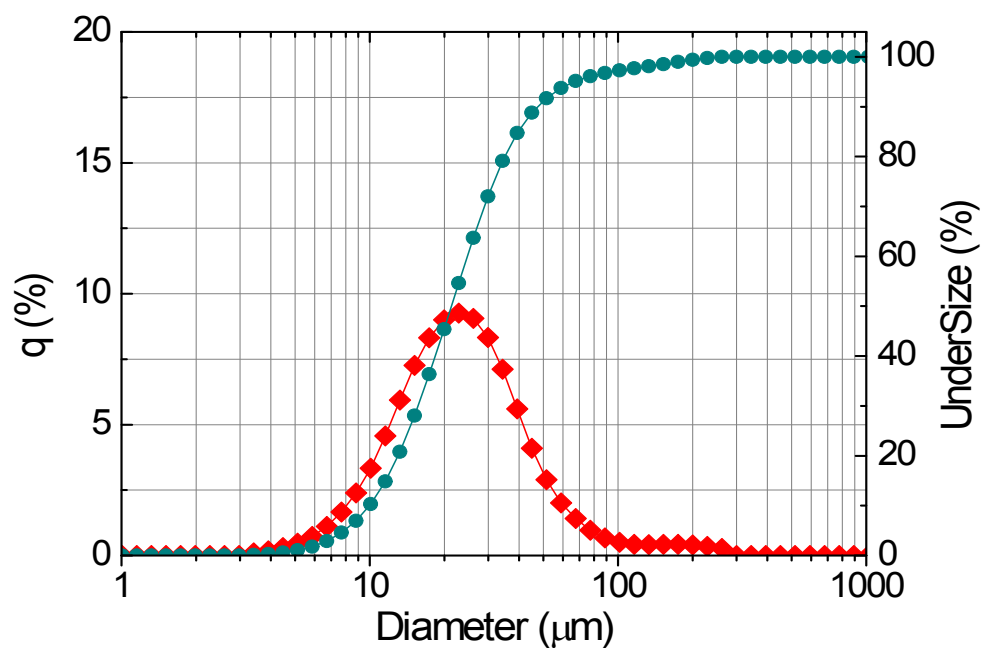

**Figure 1S** The particle-size distribution of the N-C-900 sample.

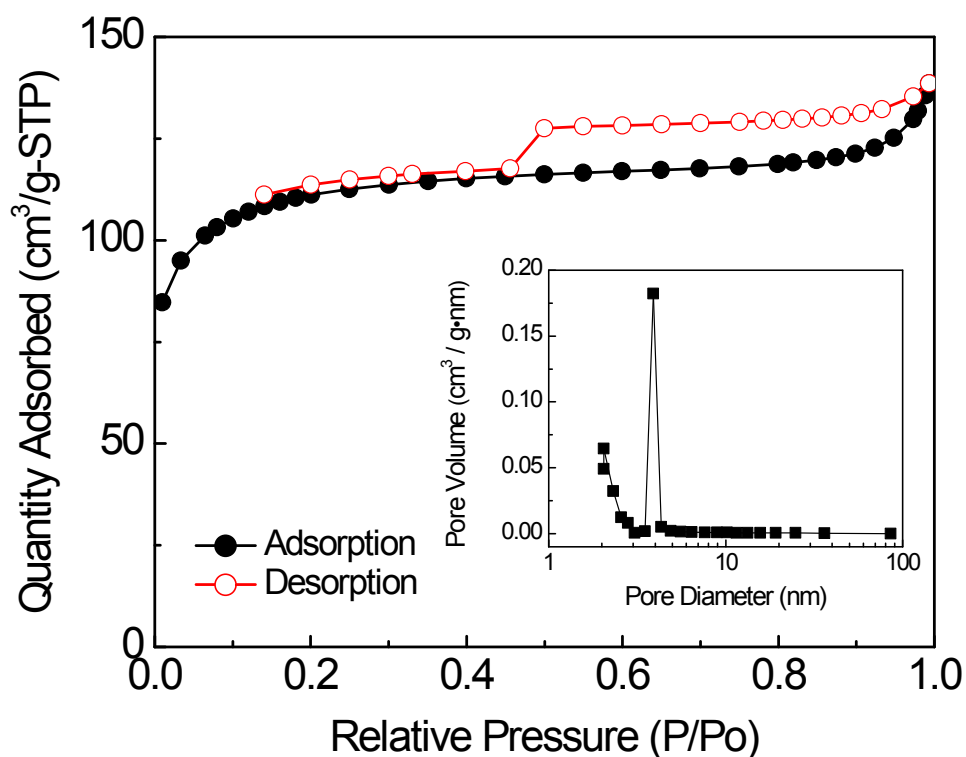

**Figure 2S** Nitrogen adsorption/desorption isotherms of N-C-900 and its corresponding pore size distribution (inset).

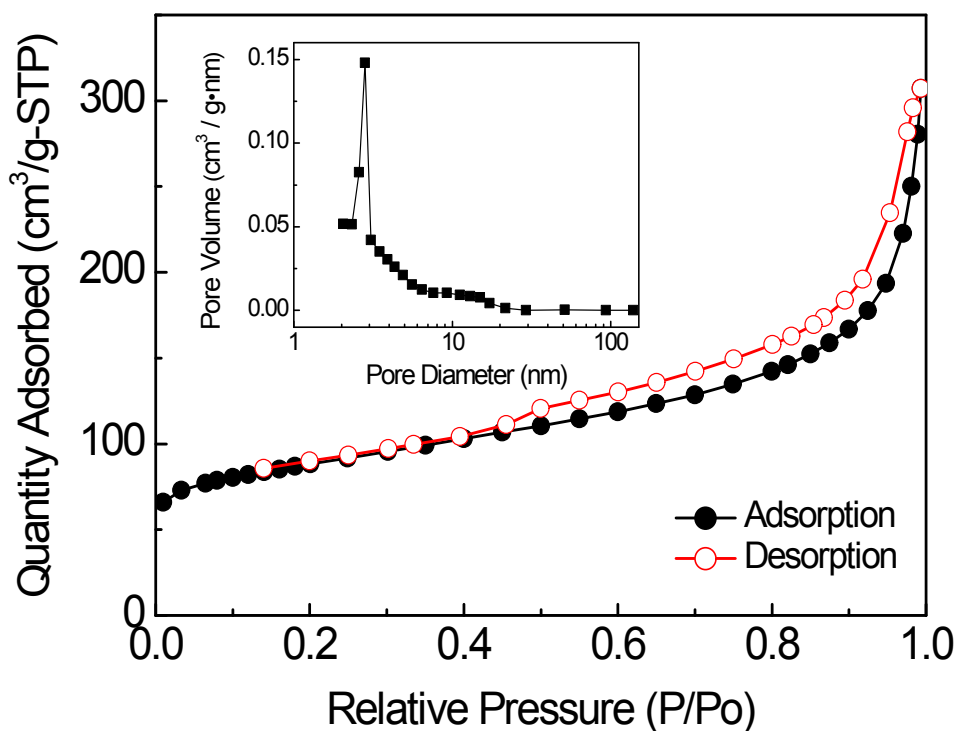

**Figure 3S** Nitrogen adsorption/desorption isotherms of N-C@CNT-900 and its corresponding pore size distribution (inset).

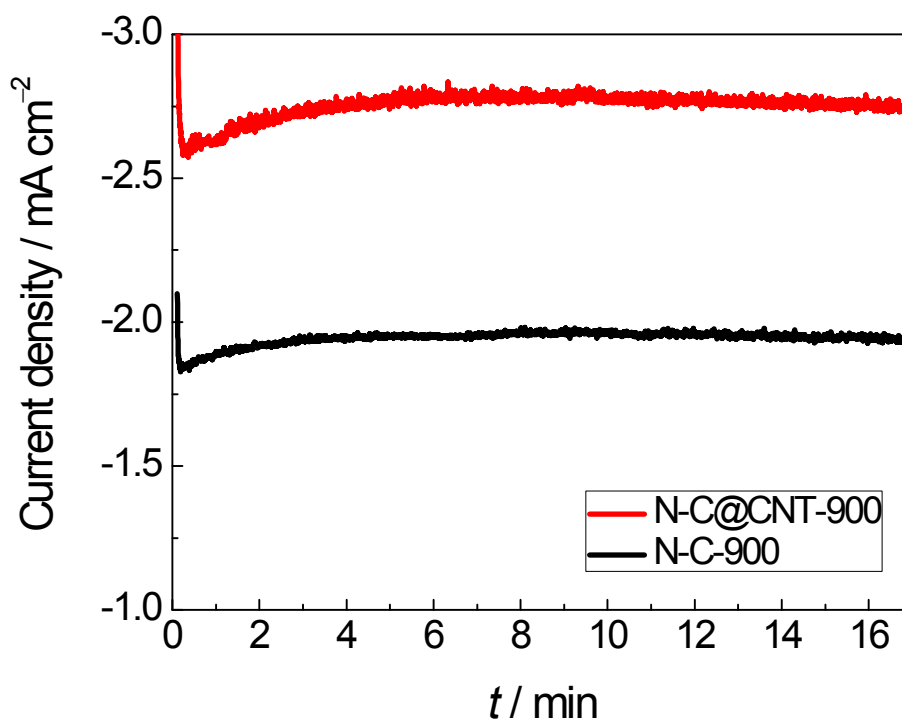

**Figure 4S** Amperometric current-time (*i*-*t*) responses for ORR at +0.7 V vs. RHE in an O<sub>2</sub>-saturated 0.1 M KOH electrolyte at N-C-900 and N-C@CNT-900 modified electrodes with a rotation speed of 1600 rpm.

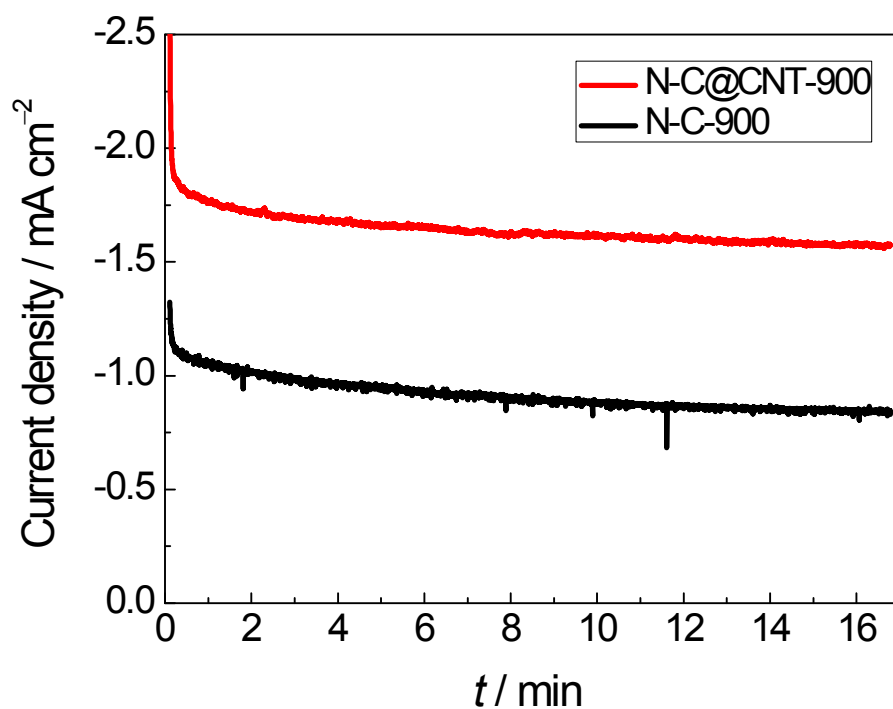

**Figure 5S** Amperometric current–time (*i*–*t*) responses for ORR at +0.5 V vs. RHE in an O<sub>2</sub>-saturated 0.5 M H<sub>2</sub>SO<sub>4</sub> electrolyte at N-C-900 and N-C@CNT-900 modified electrodes with a rotation speed of 1600 rpm.

**Table 1S.** N 1s XPS results from Fig. 4 and ORR activity data from Fig. 5 and 6 for EM, N-C-900, N-C@CNT-900, and 20 wt.% Pt/C catalyst.

| Sample       | Total N content [%] <sup>[a]</sup> | Nitrile N [%] | Pyrrolic N [%] | Graphitic N [%] | Oxidized N [%] | $E_{\text{ORR}} / \text{V}^{[b]}$ | $E_{\text{ORR}} / \text{V}^{[c]}$ | $E_{1/2} / \text{V}^{[b]}$ | $E_{1/2} / \text{V}^{[c]}$ | $j / \text{mA cm}^{-2} @ +0.5 \text{ V}^{[b]}$ | $j / \text{mA cm}^{-2} @ +0.5 \text{ V}^{[c]}$ |
|--------------|------------------------------------|---------------|----------------|-----------------|----------------|-----------------------------------|-----------------------------------|----------------------------|----------------------------|------------------------------------------------|------------------------------------------------|
| EM material  | 5.27                               | 100.0         | ---            | ---             | ---            | ---                               | ---                               | ---                        | ---                        | ---                                            | ---                                            |
| N-C-900      | 3.43                               | 26.6          | ---            | 43.3            | 30.1           | 0.87                              | 0.77                              | 0.73                       | 0.46                       | 3.62                                           | 1.56                                           |
| N-C@CNT-900  | 3.20                               | 25.5          | 33.3           | 41.2            | ---            | 0.94                              | 0.81                              | 0.81                       | 0.60                       | 3.98                                           | 2.85                                           |
| 20 wt.% Pt/C | ---                                | ---           | ---            | ---             | ---            | 0.98                              | 0.93                              | 0.86                       | 0.82                       | 5.02                                           | 3.74                                           |

<sup>a</sup>The total N content (at.%) was determined by XPS analysis in Figure 4a.

<sup>b</sup>The ORR activity data from Fig. 5 were obtained in O<sub>2</sub>-saturated alkaline electrolyte.

<sup>c</sup>The ORR activity data from Fig. 6 were obtained in O<sub>2</sub>-saturated acidic electrolyte.
